# Supplementary material for: BODIPY dye possessing solid-state red fluorescence and green metallic luster properties in both crystalline and amorphous states
Source: Royal Society of Chemistry journal article supplement (doi:10.1039/c3ra45785k), 2013-11-15
Supplement: c3ra45785k.pdf [file c3ra45785k.pdf]

## Supplementary Information

### **BODIPY dye possessing solid-state red fluorescence and green metallic luster property in both crystalline and amorphous states**

Yousuke Ooyama,\* Yuta Hagiwara, Yuichiro Oda, Hiroshi Fukuoka and Joji Ohshita\*

*Department of Applied Chemistry, Graduate School of Engineering, Hiroshima University,  
Higashi-Hiroshima, 739-8527, Japan.*

*Fax: +81 824 24 5494; Tel: +81 824 24 7689; E-mail:yooyama@hiroshima-u.ac.jp  
jo@hiroshima-u.ac.jp*

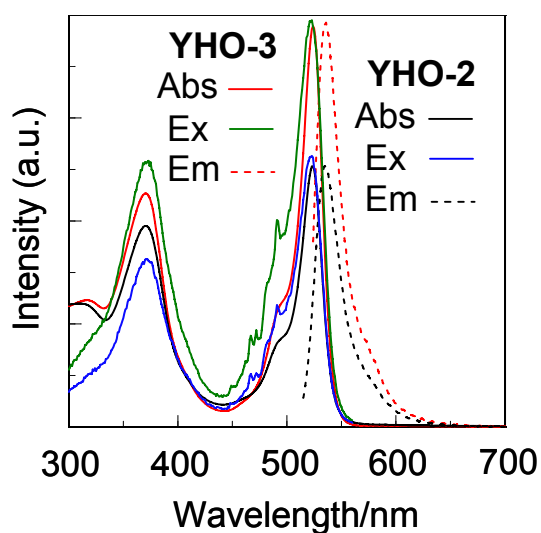

**Fig. S1** Absorption, excitation and fluorescence spectra ( $\lambda_{\text{ex}} = 509 \text{ nm}$ ) of **YHO-2** and **YHO-3** in 1,4-dioxane.

131105\_07 #7 RT: 0.07 AV: 1 NL: 1.69E6  
T: FTMS + p ESI Full ms [100.00-2000.00]

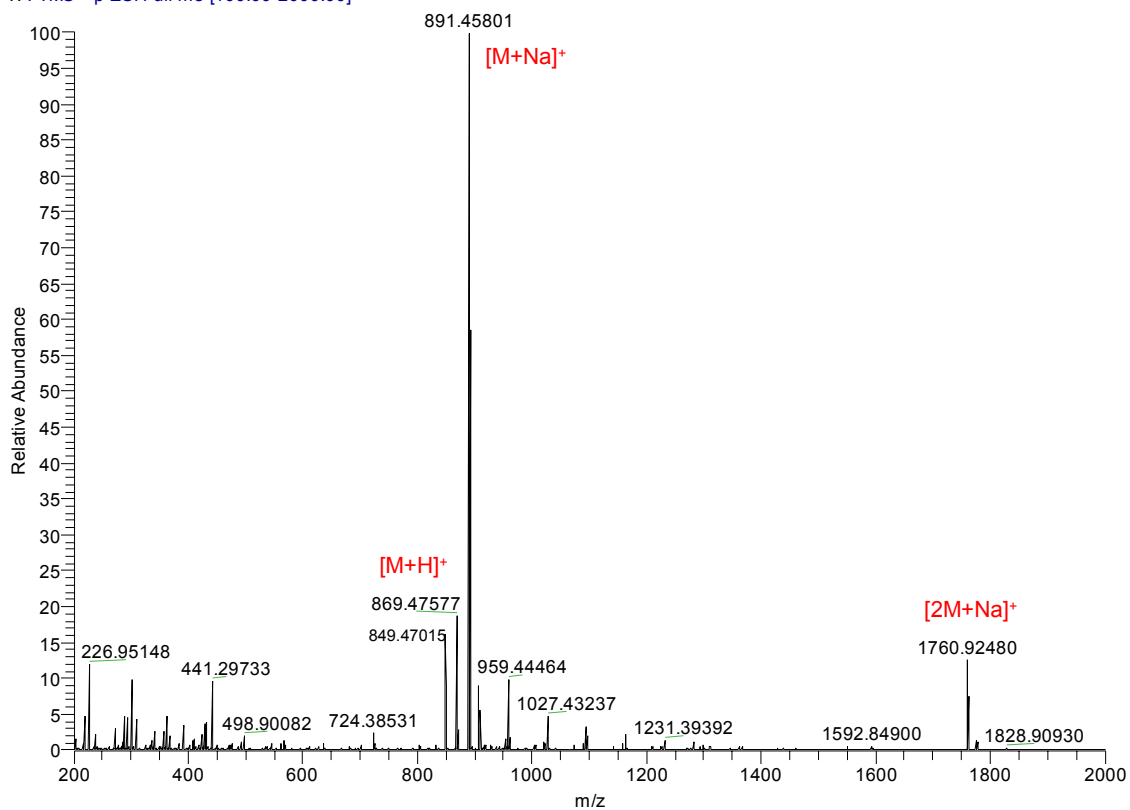

Fig. S2 HRMS (ESI) of YHO-3 after melting the ground solids.

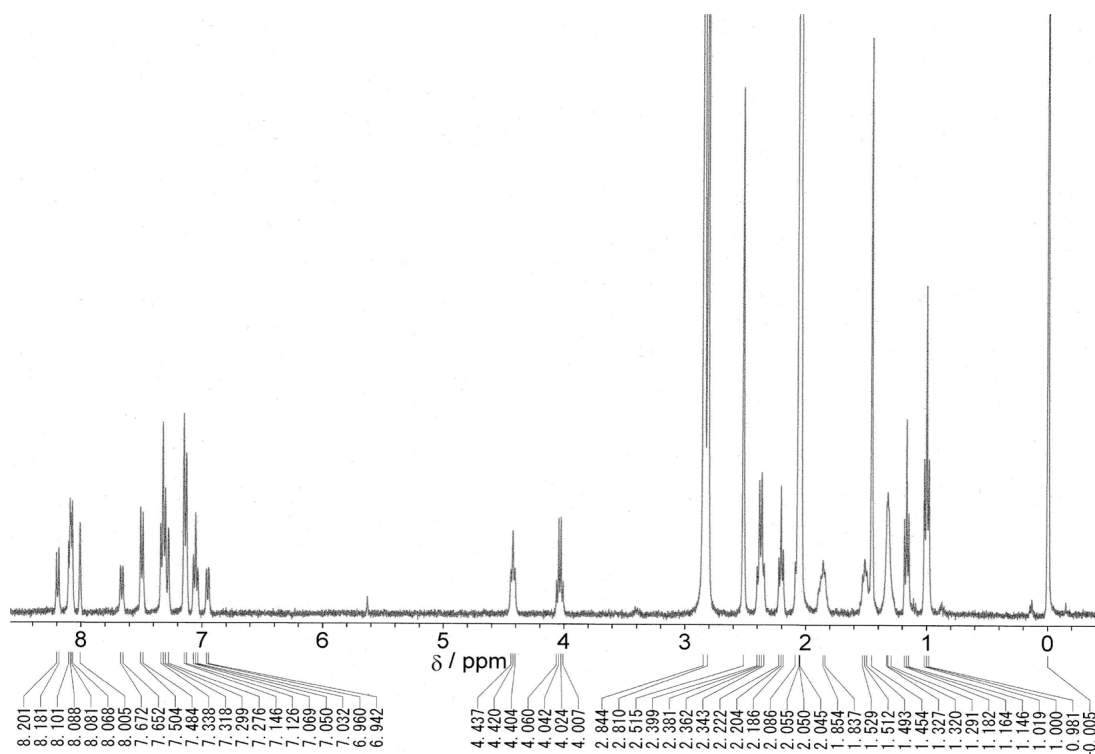

Fig. S3  $^1H$  HMR of YHO-3 after melting the ground solids (400 MHz, acetone- $d_6$ , TMS).
